# Supplementary material for: Understanding Physicians’ Challenges When Treating Type 2 Diabetic Patients’ Social and Emotional Difficulties: A qualitative study
Source: PubMed Central journal article supplement — Diabetes Care. 2011 Apr 20;34(5):1086–8. doi: 10.2337/dc10-2298 (PMC3114520; doi:10.2337/dc10-2298), 2011-04-20
Supplement: supp_dc10-2298v102298_DC102298SupplementaryData.pdf [file supp_dc10-2298v102298_DC102298SupplementaryData.pdf]

**Appendix - Interview Questions for Physicians about Patients with Type 2 Diabetes**

1. Describe the physician's role in the management of type 2 diabetes.  
**Probe:** What are markers of success?
2. Describe the patient's role/responsibility in the management of his or her type 2 diabetes.  
**Probe:** What roles/tasks do you think your type 2 diabetes patients should do?
3. Do your patients with type 2 diabetes differ from your other patients?  
**If so:** In what ways?
4. For your patients with type 2 diabetes, do you use a team approach?  
**If so:** Who makes up the team?  
**Probe:** What are your expectations of the treatment team?  
**Probe:** How does the treatment team contribute to treatment success or failure?
5. Describe the most common reason for failure or success in achieving clinical goals.  
**Probe:** What are other reasons for failure or success in achieving clinical goals?
6. How do you feel when your diabetes patient is not meeting the goals that have been set?  
**Probe:** How do you think your patient feels?
7. Has there ever been a time when you have felt frustrated or ineffective in your work with a patient with diabetes? Please describe.  
**Probe:** Do you ever get angry with your diabetes patients for not improving in their self-care? Please give an example.
8. Describe the patient who is most likely to achieve glycemic targets.
9. Describe the patient who is most likely NOT to achieve glycemic targets.
10. Have you ever felt your patients misrepresented or withheld information about their diabetes self-care?  
**If so:** Why do you think some patients misrepresent or withhold information?
11. How do you feel when your diabetes patient presents with social and emotional difficulties?  
**Probe:** How do you respond to patients' social and emotional difficulties?
12. How do you see your attitudes and behaviors as a physician affecting your diabetes patients' self-care?
13. As a physician, what do you see as the most effective means of improving the self care of your patients with diabetes?
14. How do you best collaborate with your patient in the treatment of type 2 diabetes?
15. Is there anything else about the physician/patient relationship that you want to share?
